# Supplementary material
Source: publisher figshare collection journal article supplement (https://sage.figshare.com/ndownloader/files/13327574)
Supplement: Supplementary file 1 [file 13327574]

**Confrontation and Competition:  
The Electoral Benefits of Regionalist Parties' Positions in Parliamentary Democracies**

**Appendix**

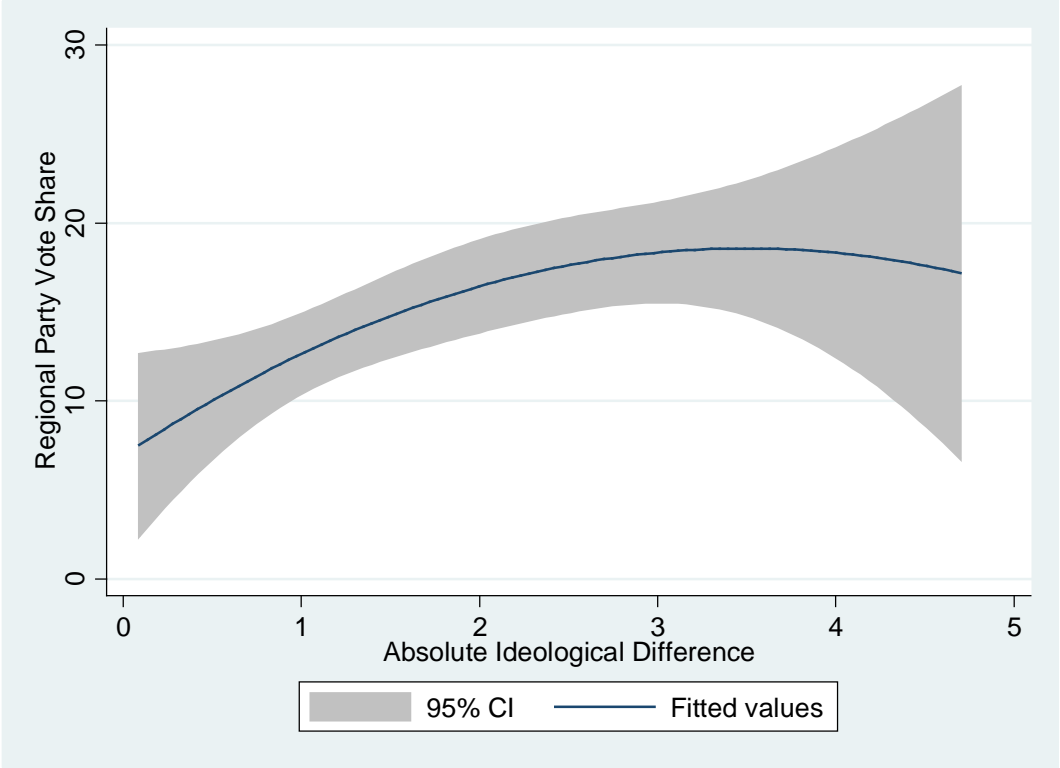

**Figure A1: Figure 1 as a quadratic (Historic National)**

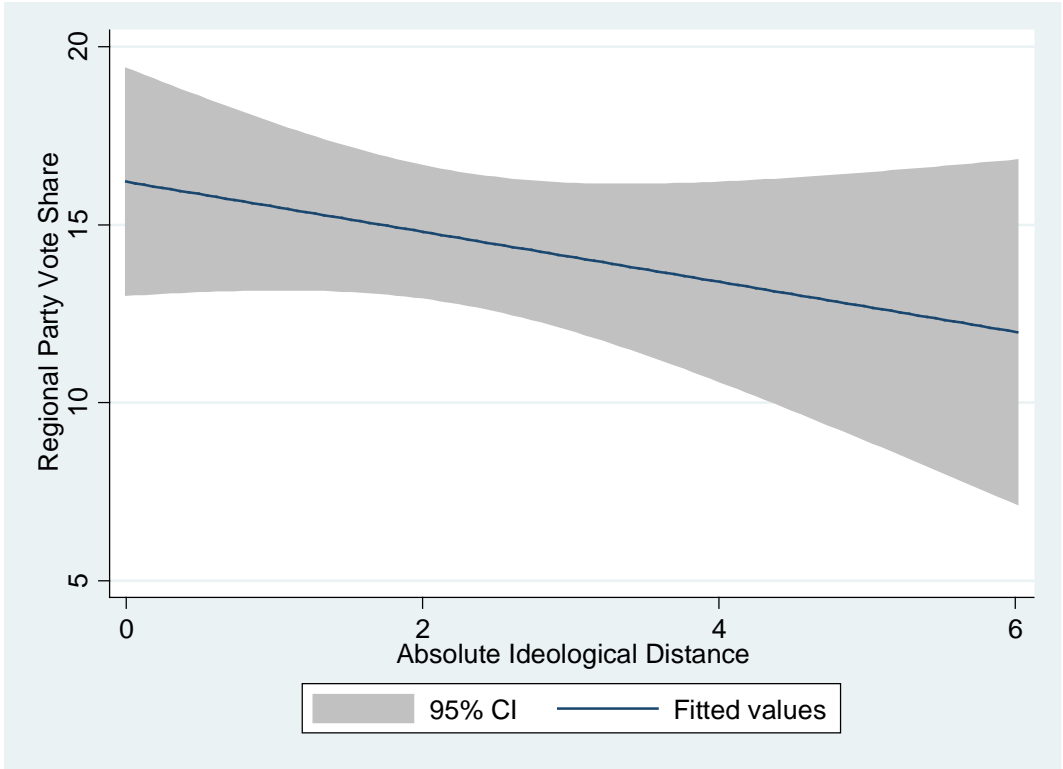

**Figure A2: Figure 2 as a linear (Historic Local)**
